# Supplementary material
Source: PubMed Central journal article supplement (PMC4941860)
Supplement: ACI-07-0560-s001.pdf [file ACI-07-0560-s001.pdf]

<http://dx.doi.org/10.4338/ACI-2015-11-RA-0159>

## SUPPLEMENTARY MATERIALS

**Test performance of the severe sepsis alert using a billing code for severe sepsis or septic shock as the gold standard.** Data reflects all inpatient encounters from November 1, 2013 – February 1, 2014 (N = 6,218).

|                           |                       |
|---------------------------|-----------------------|
| Sensitivity               | 95.2% (92.5% - 97.4%) |
| Specificity               | 79.9% (78.8% - 80.9%) |
| Positive Predictive Value | 18.8% (16.9% - 20.9%) |
| Negative Predictive Value | 99.7% (99.5% - 99.9%) |
| Accuracy                  | 80.6% (79.5% - 81.5%) |

**Alert performance using coding data.** Presence or absence of severe sepsis was determined by the presence of an ICD-9 billing code for severe sepsis or septic shock (primary or secondary diagnosis) (N = 6,218).

| Alert result | Severe sepsis present | Severe sepsis not present |
|--------------|-----------------------|---------------------------|
| Positive     | 276                   | 1,193                     |
| Negative     | 14                    | 4,735                     |

**Alert performance using chart review. A sample was validated using physician chart review to determine the presence or absence of severe sepsis.** Unweighted and weighted (parentheses) data are presented (N = 175).

| Alert result | Severe sepsis present | Severe sepsis not present |
|--------------|-----------------------|---------------------------|
| Positive     | 63 (738)              | 37 (730)                  |
| Negative     | 4 (253)               | 71 (4495)                 |
